# Supplementary material for: Structure of the G protein chaperone and guanine nucleotide exchange factor Ric-8A bound to Gαi1
Source: PubMed Central journal article supplement (PMC7044438; doi:10.1038/s41467-020-14943-4), 2020-02-26
Supplement: 41467_2020_14943_MOESM1_ESM.pdf [file 41467_2020_14943_MOESM1_ESM.pdf]

## Supplementary Data

Structure of the cytosolic G protein alpha chaperone and guanine nucleotide exchange factor Ric-8A bound to G $\alpha$ 1

McClelland, *et al.*

---

**Supplementary Table 1**  
**Cryo-EM Data Collection and Refinement Statistics**

---

| <b>Data collection and processing</b> | Ric-8A(491): $\Delta$ 31NG $\alpha$ i1:4Nb |
|---------------------------------------|--------------------------------------------|
| Microscope                            | Titan Krios                                |
| Voltage (kV)                          | 300                                        |
| Camera                                | Gatan K2 Summit                            |
| Pixel size (Å)                        | 1.06                                       |
| Total Dose (e-/Å <sup>2</sup> )       | 69                                         |
| Defocus range (μm)                    | -1 to -3                                   |
| Number of micrographs                 | 8,670                                      |
| Number of initial particles           | 768,736                                    |
| Symmetry                              | C1                                         |
| Number of final particles             | 327,493                                    |
| Resolution (0.143 FSC, Å)             | 3.90                                       |
| <hr/> <b>Atomic model refinement</b>  |                                            |
| Software                              | phenix.real_space_refine                   |
| Clashscore, all atoms                 | 8.79                                       |
| Poor rotamers (%)                     | 0.57                                       |
| Favored rotamers (%)                  | 99.43                                      |
| Ramachandran favored (%)              | 84.24                                      |
| Ramachandran allowed (%)              | 15.76                                      |
| MolProbity score                      | 2.15                                       |
| Bond RMSD (Å)                         | 0.006                                      |
| Angle RMSD (Å)                        | 1.005                                      |

---

**Supplementary Table 2**  
**Crystallographic Data Collection and Refinement Statistics**

| <b>Data collection</b>                  | Ric-8A(491):Δ31NGαi1:3NB                           |                            |                            |
|-----------------------------------------|----------------------------------------------------|----------------------------|----------------------------|
| Software                                | AutoPROC/STARANISO                                 | XDS/AIMLESS                | SCALA                      |
| Reflection scaling method <sup>#</sup>  | Anisotropic filtered (extended)                    | Isotropic (extended)       | Isotropic (standard)       |
| Wavelength (Å)                          | 0.979                                              | 0.979                      | 0.979                      |
| Resolution range (Å)*                   | 39.58 - 3.3<br>(3.9 - 3.3)<br>[a*, b*=4.6, c*=3.3] | 39.65 - 3.3<br>(3.9 - 3.3) | 39.65 - 4.6<br>(4.7 - 4.6) |
| Space group                             | P 2 <sub>1</sub>                                   | P 2 <sub>1</sub>           | P 2 <sub>1</sub>           |
| Unit cell dimensions                    |                                                    |                            |                            |
| a, b, c (Å)                             | 93.0 144.7 114.4                                   | 93.0 144.7 114.4           | 93.0 144.7 114.4           |
| β (°)                                   | 94.7                                               | 94.7                       | 94.7                       |
| Total reflections*                      | 73843 (3449)                                       | 160159 (62218)             | 58730 (2930)               |
| Unique reflections*                     | 20707 (1035)                                       | 44840 (17203)              | 16296 (796)                |
| Redundancy*                             | 3.6 (3.3)                                          | 3.6 (3.6)                  | 3.6 (3.7)                  |
| Completeness [spherical] (%)*           | 45.8 (6.0)                                         | 99.1 (99.1)                | 99.1 (99.5)                |
| Completeness [ellipsoidal] (%)*         | 90.1 (58.2)                                        | 98.3 (91.5)                |                            |
| Mean I/σ (I)*                           | 3.7 (1.7)                                          | 1.9 (0.3)                  | 4.1 (2.2)                  |
| Wilson B-factor                         | 91.88                                              |                            |                            |
| R <sub>meas</sub> <sup>†,*</sup>        | 0.21 (0.70)                                        | 0.55 (4.65)                | 0.18 (0.54)                |
| R <sub>p.i.m.</sub> <sup>†,*</sup>      | 0.11 (0.38)                                        | 0.29 (2.42)                | 0.10 (0.28)                |
| CC <sub>1/2</sub> <sup>†</sup>          | 0.99 (0.70)                                        | 0.97 (0.17)                | 0.99 (0.86)                |
| <b>Refinement</b>                       |                                                    |                            |                            |
| R <sub>work</sub> <sup>†,*</sup>        | 0.248 (0.319)                                      |                            |                            |
| R <sub>free</sub> <sup>†,*</sup>        | 0.287 (0.323)                                      |                            |                            |
| CC <sub>work</sub> <sup>†*</sup>        | 0.907 (0.719)                                      |                            |                            |
| CC <sub>free</sub> <sup>†*</sup>        | 0.866 (0.893)                                      |                            |                            |
| Number of total atoms                   |                                                    |                            |                            |
| protein                                 | 15938                                              |                            |                            |
| total protein residues                  | 2021                                               |                            |                            |
| RMS deviations                          |                                                    |                            |                            |
| bond lengths (Å)                        | 0.002                                              |                            |                            |
| bond angles (°)                         | 0.55                                               |                            |                            |
| Ramachandran favored (%) <sup>††</sup>  | 89.16                                              |                            |                            |
| Ramachandran allowed (%) <sup>††</sup>  | 10.53                                              |                            |                            |
| Ramachandran outliers (%) <sup>††</sup> | 0.30                                               |                            |                            |
| Rotamer outliers (%) <sup>††</sup>      | 0.0                                                |                            |                            |
| Clash Score <sup>††</sup>               | 10.32                                              |                            |                            |
| Average B-factor                        |                                                    |                            |                            |
| Macromolecules                          | 109.97                                             |                            |                            |
| Number of TLS groups                    | 1                                                  |                            |                            |

<sup>#</sup>The standard isotropic scaling method uses the classical isotropic treatment in truncate program where the resolution cut is determined by (1) R<sub>p.i.m.</sub> ≤ 0.6, average I/σ(I) in a resolution bin ≥ 2.0, and CC<sub>1/2</sub> ≥ 0.3. The extended isotropic method includes all the measurements within the sphere of the highest observed resolution limit where the local I/σ(I) ≥ 1.2; the extended anisotropic method uses the anisotropically-filtered reflections by STARANISO with the same resolution limit as the extended isotropic method. \* Data for highest resolution shell are given in brackets. <sup>†</sup>  $R_{meas} = \frac{\sum_{hkl} (n/n-1)^{1/2} \sum_i |I_i(hkl) - \langle I(hkl) \rangle|}{\sum_{hkl} \sum_i I_i(hkl)}$ , where I<sub>i</sub>(hkl) is the i<sup>th</sup> observation of the intensity of the reflection hkl and <I(hkl)> is the mean over n observations.  $R_{p.i.m.} = \frac{\sum_{hkl} (1/n-1)^{1/2} \sum_i |I_i(hkl) - \langle I(hkl) \rangle|}{\sum_{hkl} \sum_i I_i(hkl)}$ . <sup>§</sup>  $R_{work} = \frac{\sum_{hkl} |F_{obs} - F_{calc}|}{\sum_{hkl} |F_{obs}|}$ , where F<sub>obs</sub> and F<sub>calc</sub> are the observed and calculated structure-factor amplitudes for each reflection hkl. R<sub>free</sub> was calculated for 5% of the diffraction data that were selected randomly and excluded from refinement. Correlation coefficients:  $CC = \frac{\sum_i (x_i - \langle x \rangle)(y_i - \langle y \rangle)}{(\sum_i (x_i - \langle x \rangle)^2 (\sum_i (y_i - \langle y \rangle)^2)^{1/2}}$ , where x<sub>i</sub> and y<sub>i</sub> are the i<sup>th</sup> of n observations of quantities whose mean values are <x> and <y>; for CC<sub>1/2</sub>, x<sub>i</sub> and y<sub>i</sub> correspond to intensity measurements derived from each of two randomly selected half-data sets from the set of unmerged data; For CC<sub>work</sub> and CC<sub>free</sub> x<sub>i</sub> and y<sub>i</sub> refer to observed structure factor amplitudes and structure factor amplitudes computed from the refined atomic model, respectively, for the working data set and the set used to compute R<sub>free</sub>. <sup>††</sup>Calculated using MolProbity

**a**

```

NB_8109 A QVQLQESGGGLEQAGDSLRLSCAASGLIVSNYAMGWFRQAPGKEREFVAYINWNGGVTY 60
NB_9156 - QVQLQESGGGLEQAGDSLRLSCAASGLIVSNYAMGWFRQAPGKEREFVAYINWNGGVTY 59
NB_8117 - QVQLQESGGGLVQPGGSLRLSCAASGIIFRSNGMAWYRQAPGKEREWASITSPFGDA-I 58
NB_8119 - QVQLQESGGGLVQAGGSLRLSCAASGGIVHISSMGWFRQAPGKQRELVATSPSNGDI-R 58
***** * *.***** * .*.*****:** * *
.

NB_8109 Y TNSVKGRFTISRDNAKNTVYLQMNSLKPEDTAVYYCARTSRASVTTRVADFGYWGQGTQ 120
NB_9156 Y TNSVKGRFTISRDNAKNTVYLQMNSLKPEDTAVYYCARTSRASVTTRVADFGYWGQGTQ 119
NB_8117 Y RDSVKGRFTISRDNARNAVSLQTNLSKTEDTAVYYCNTYPV-----NSAWGQGTQ 109
NB_8119 Y ADSVKGRFTLSRDNAKNTVSLQMNSLEPEDTAVYYCHSFLRHTAS--ASYNYYGQGTQ 116
* :*****:**:** * * ** * ** : *****
. :*****

NB_8109 V TVSSHHHHHHEPEA 135
NB_9156 V TVSSHHHHHHEPEA 134
NB_8117 V TVSSHHHHHHEPEA 124
NB_8119 V TVSSHHHHHHEPEA 131
*****

```

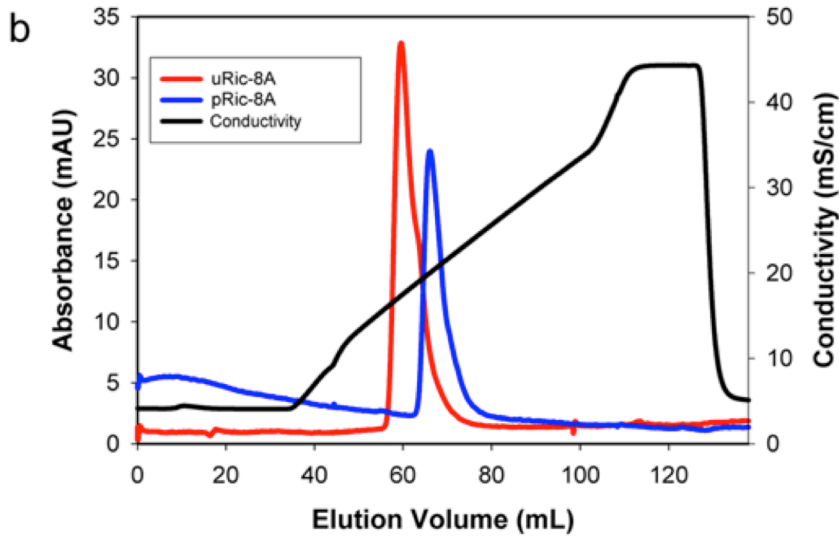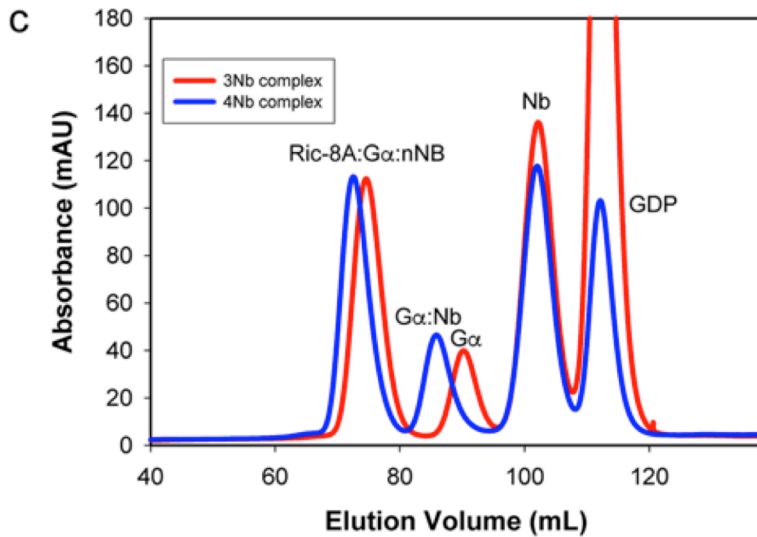

**Supplementary Figure 1. Purification of Ric-8A:Gα:Nb complexes.** **a**, Amino acid sequences of nanobodies used to form complexes. **b**, Anion exchange chromatography of phosphorylated (pRic-8A) and unphosphorylated (uRic-8A). **c**, Gel filtration of complexes at the following molar stoichiometric ratios: 1 Ric-8A:2 Gα:2 Nb 8109:2 Nb 8117:2 Nb 8119 (red) and 1 Ric-8A:2 Gα:2 Nb 8109:2 Nb 8117:2 Nb 8119:4 Nb 9156 (blue) molar stoichiometric ratios, Ric-8A and Gα correspond to the 1-491 residue construct of Ric-8A and the 31N-terminal truncation mutant of Gα1, respectively, as described in the main text. (see Methods).



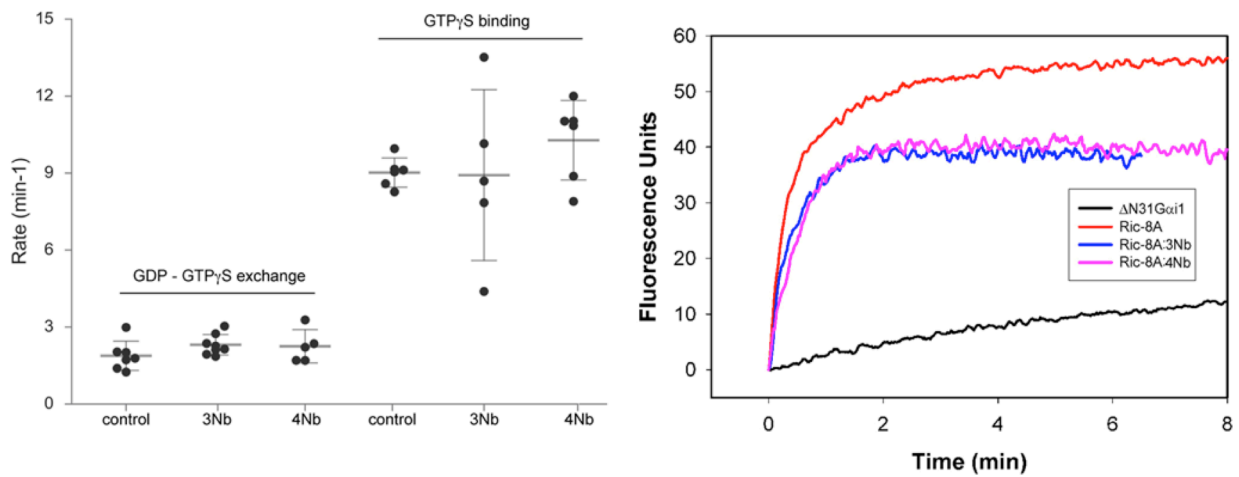

**Supplementary Figure 2 Effect of nanobodies on GEF activity of Ric-8A.** **a**, GDP-GTP exchange rates were measured by the rate of tryptophan fluorescence increase upon addition of  $\Delta N31G\alpha i1$  to Ric-8A and GTP $\gamma$ S at final concentrations of 2 $\mu$ M Ric-8A, 1 $\mu$ M  $\Delta N31G\alpha i1$  and 10 $\mu$ M GTP $\gamma$ S in the absence (control) or presence of Nb 8109 (4  $\mu$ M), Nb 8117 (4  $\mu$ M), Nb 8119 (4  $\mu$ M) (3Nb) or the latter with the addition of (4  $\mu$ M) Nb 9156 (4Nb). GTP binding rates were measured by tryptophan fluorescence increase upon addition of GTP $\gamma$ S (10  $\mu$ M final concentration) to size exclusion chromatography-purified Ric-8A: $\Delta N31G\alpha i1$ :nNb (1  $\mu$ M). Progress curves for the 3Nb and 4Nb GDP-GTP $\gamma$ S exchange and 4Nb GTP $\gamma$ S binding assays were fit to a single exponential rate, whereas data for controls and the 3Nb GTP $\gamma$ S binding assay were fit to a double exponential model, due to the presence of a slow kinetic phase, and the kinetic constant of the fast rate ( $k_1$ ) reported. In all cases average and standard deviations of measurement are reported for a minimum of 5 experimental replicates. **b**, Sample progress curves for the data reported in panel **a**.

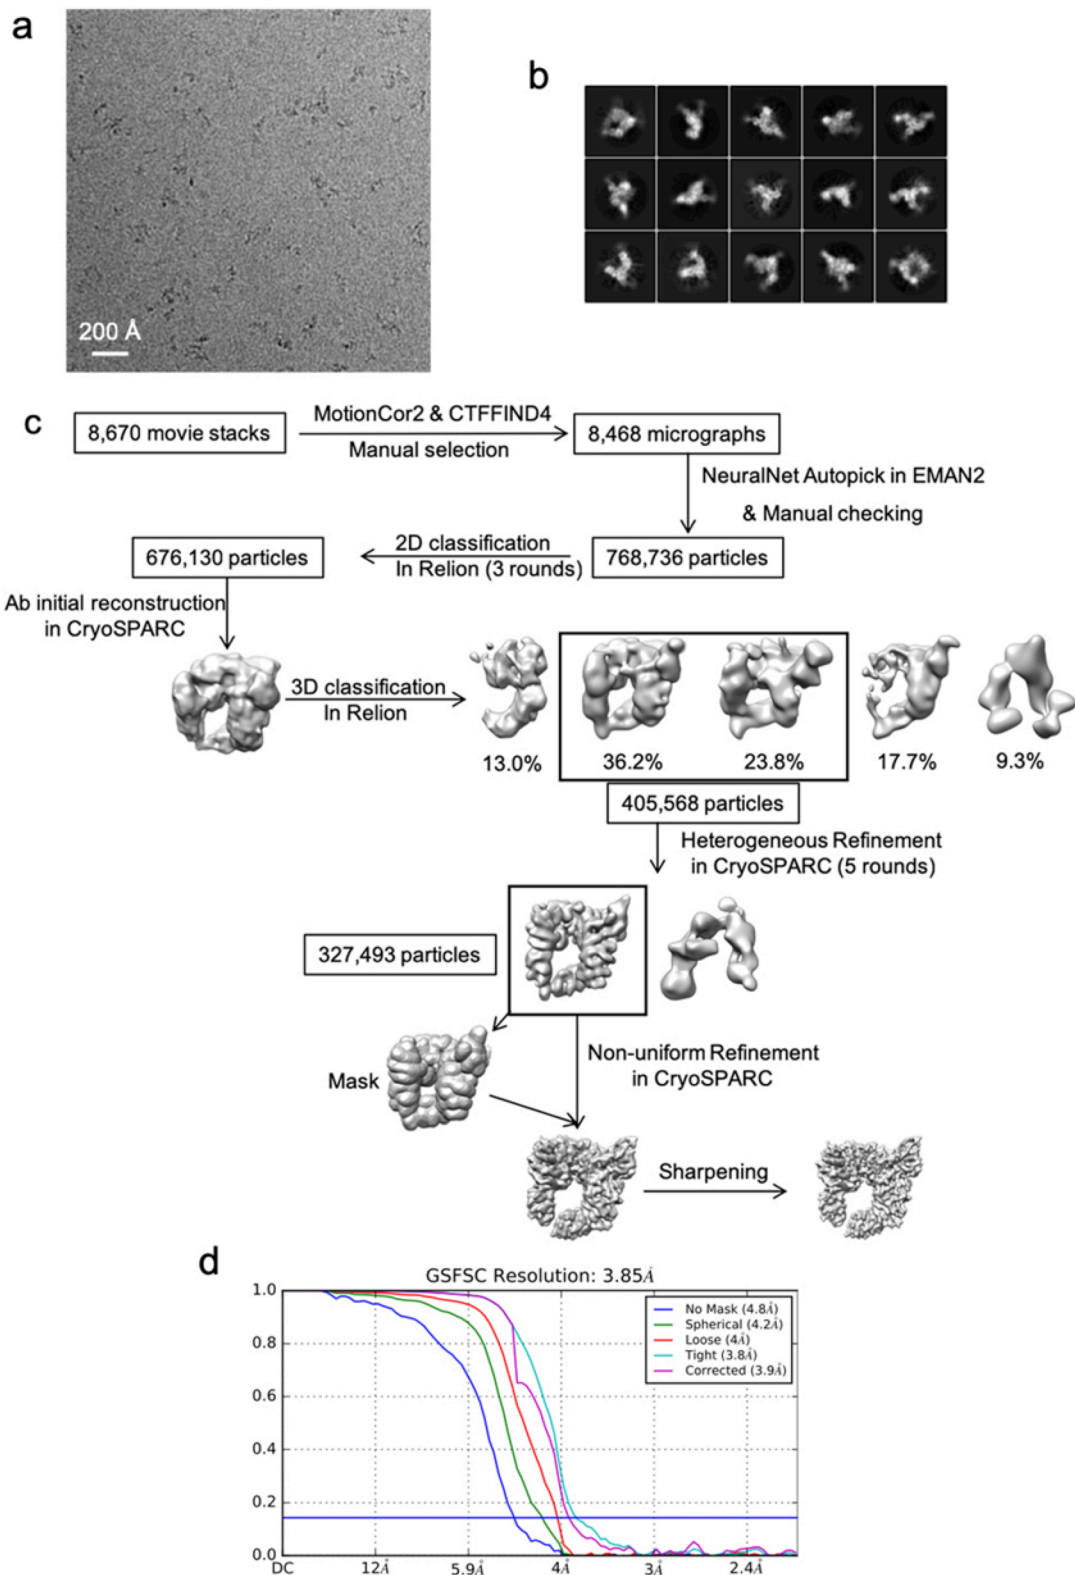

**Supplementary Figure 3. Single-particle cryo-EM of Ric-8A:Gα:4Nb complex and Workflow of cryo-EM image processing.** **a**, Representative motion corrected cryo-EM micrograph. **b**, Reference-free 2D Class averages computed in Relion. **c**, Workflow for cryo-EM processing (see Methods). **d**, Gold-standard Fourier Shell Correlation plot for 3D reconstruction generated using CryoSPARC.

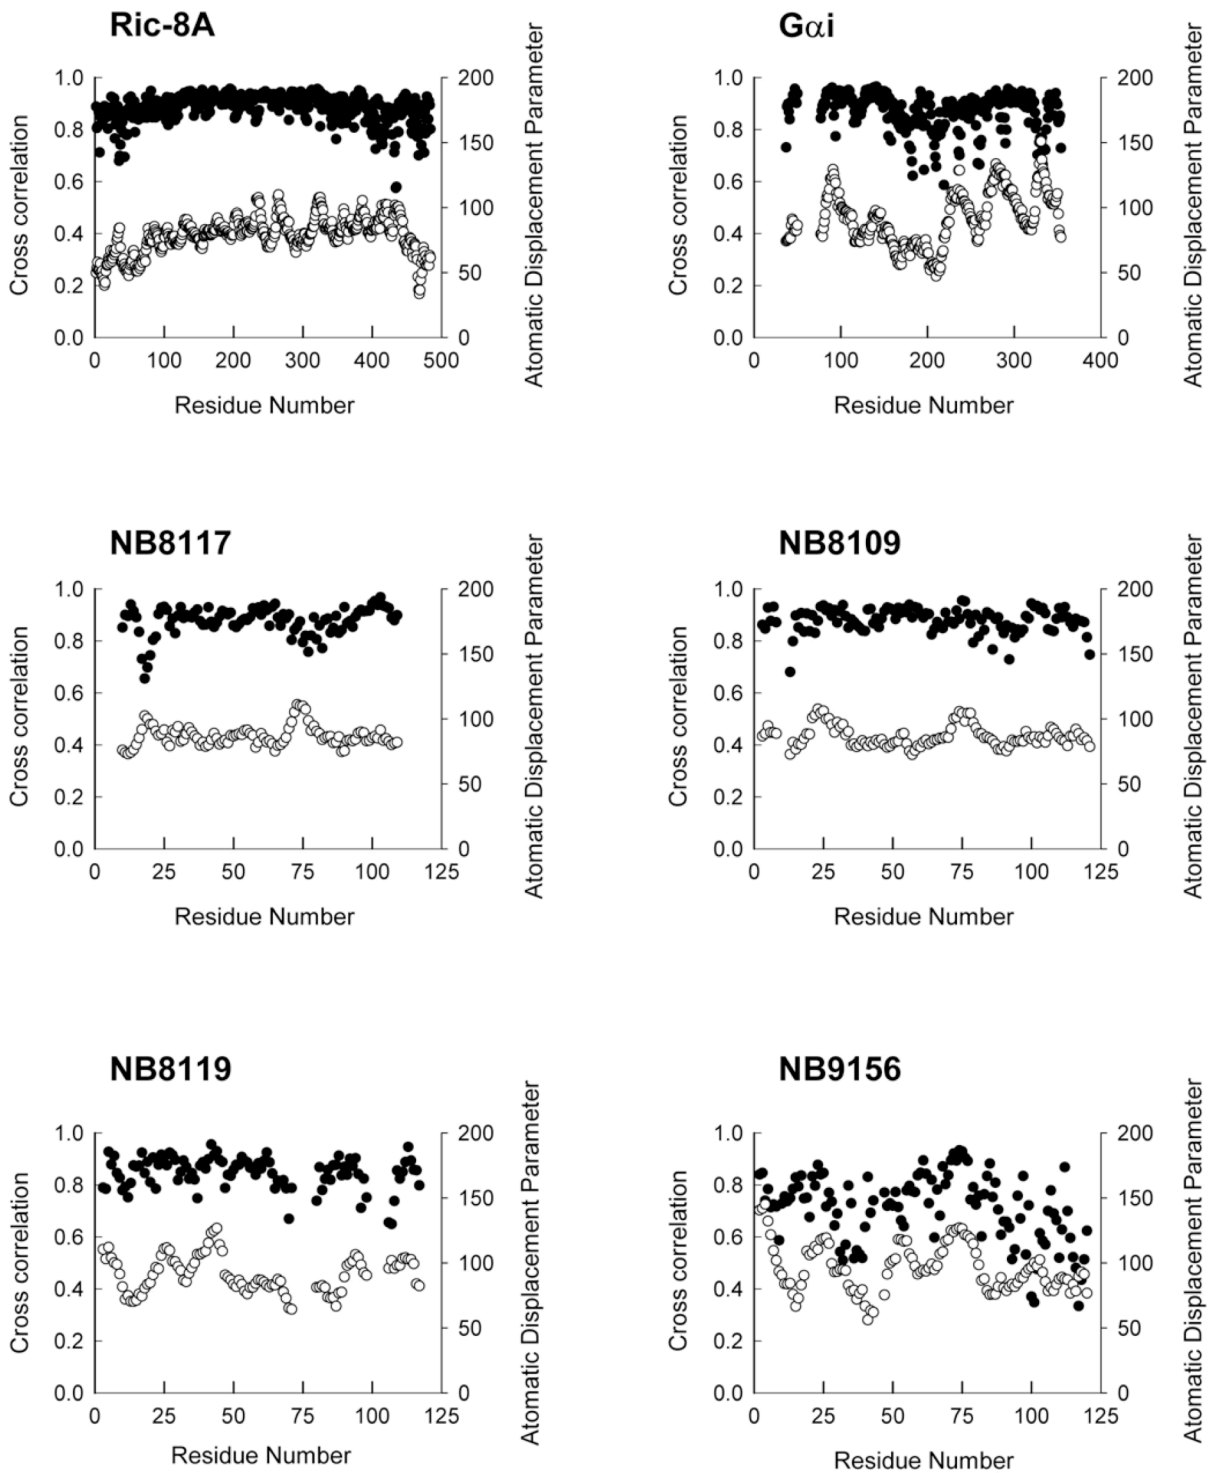

**Supplementary Figure 4. Real-space refinement of Ric-8A:Gα model fit to cryo-EM map.** Model-map correlation (filled circles) and atomic displacement parameter (open circles) are plotted with respect to residue number for the macromolecular components of the Ric-8A:Gα:4NB model derived from cryo-EM map. Data were generated using the phenix.real space refine program from the PHENIX suite.

**a**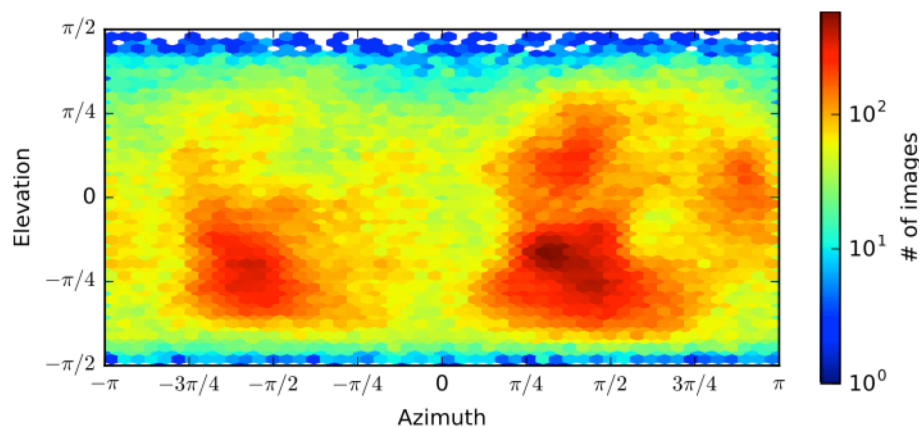**b**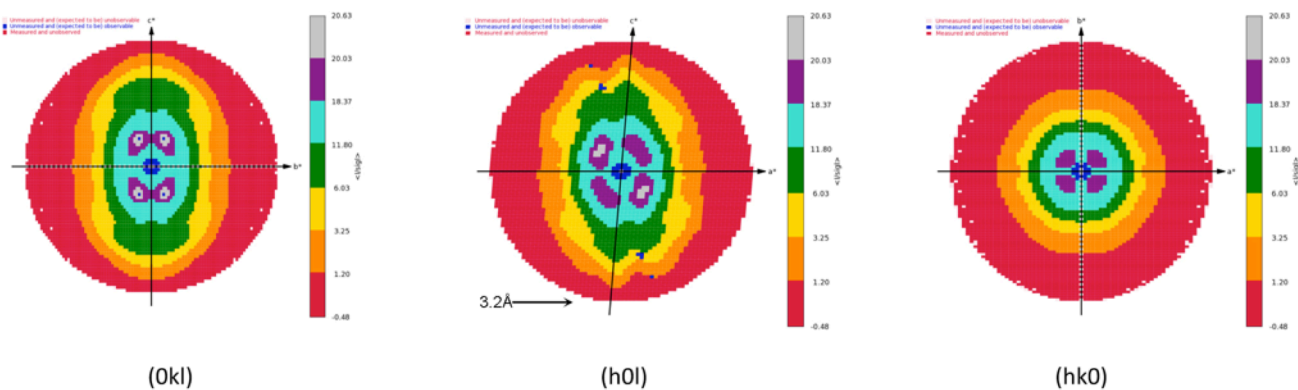

**Supplementary Figure 5 Completeness of Cryo-EM and X-ray crystallographic data in real and reciprocal space. a**, Distribution of particle orientations, generated using cryoSPARC in images used to generate 3D cryo-EM reconstruction. **b**, Projections of diffraction intensities from crystals of the Ric-8A:Gα:3Nb complex along reciprocal cell axes and color-coded by  $I/\sigma$ . Data generated using the STARANISO sever (see Methods).

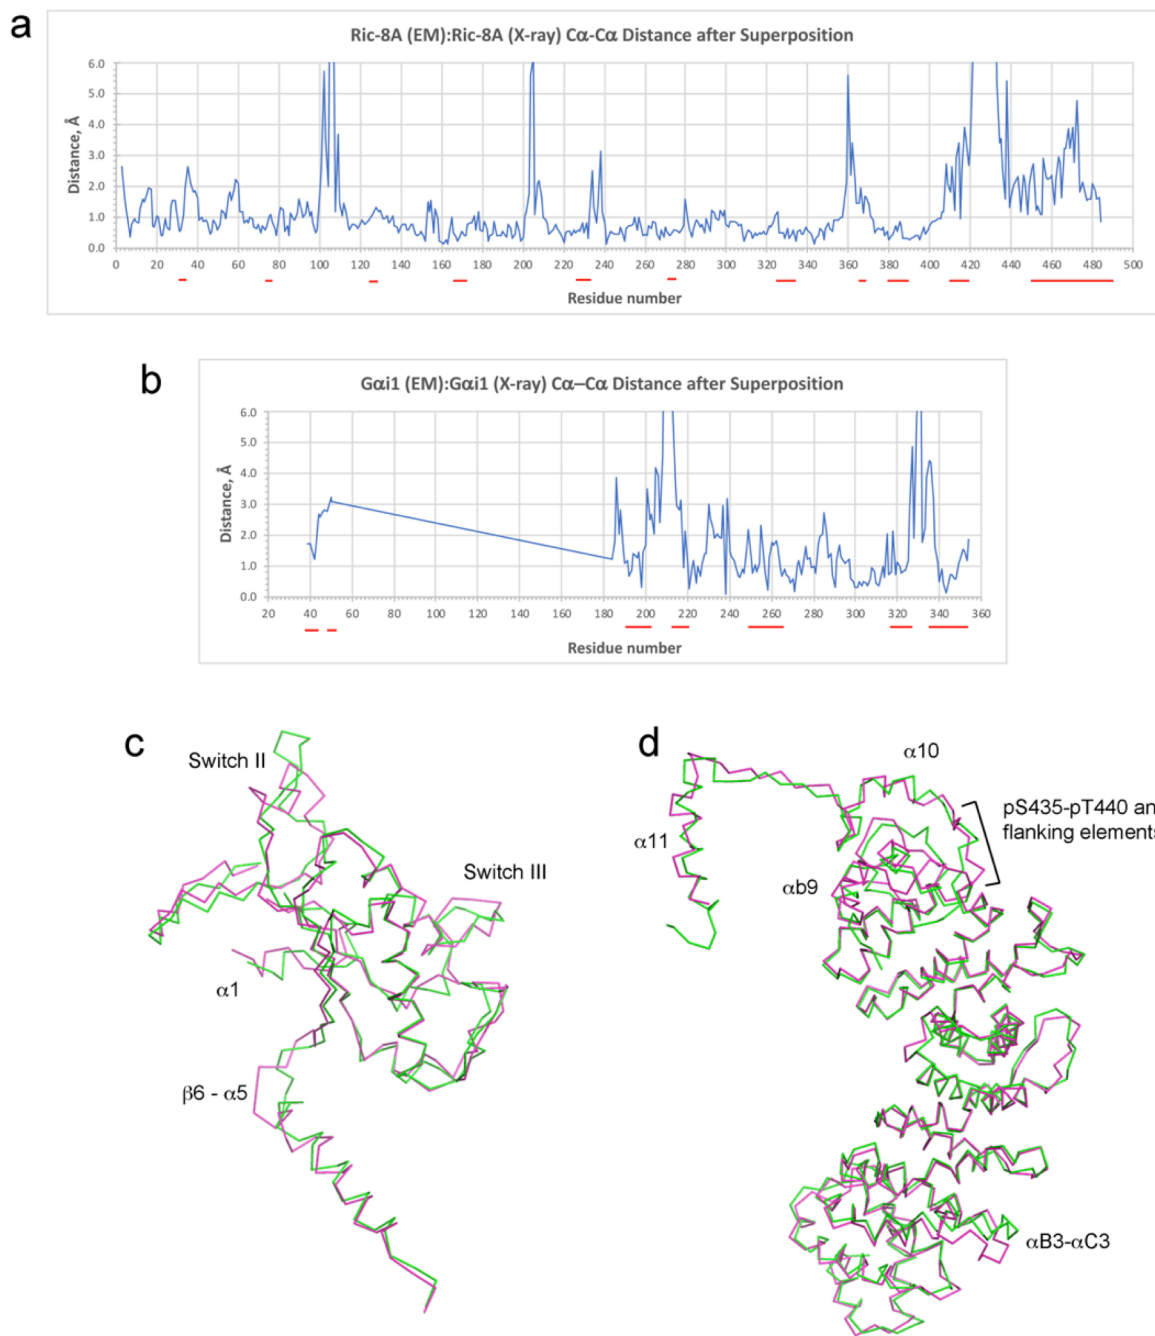

**Supplementary Figure 6. Agreement of cryo-EM and X-ray structures of Ric-8A:Gai1.** **a**, Deviation between corresponding C $\alpha$  atoms after least-squares superposition of Ric-8A coordinates. Red lines below residue numbers mark regions at which Ric-8A contacts Gai1 (see also ED Figure 10). The RMSD for all 484 common C $\alpha$  positions is 1.81Å. The PyMOL align routine yields an RMSD of 1.03Å after rejection of 69 outliers. **b**, Deviation between Gai1 atoms, computed per panel **a**. The RMSD for all 183 common C $\alpha$  positions is 2.36Å; PyMol align yields an RMSD of 1.49Å after rejection of 21 outliers. **c**, Superposition of cryoEM (magenta) and X-ray (green) structures of Gai1. Structural elements that show the largest structural differences are labeled. **d**, Superposition of Ric-8A models, as per panel **c**.

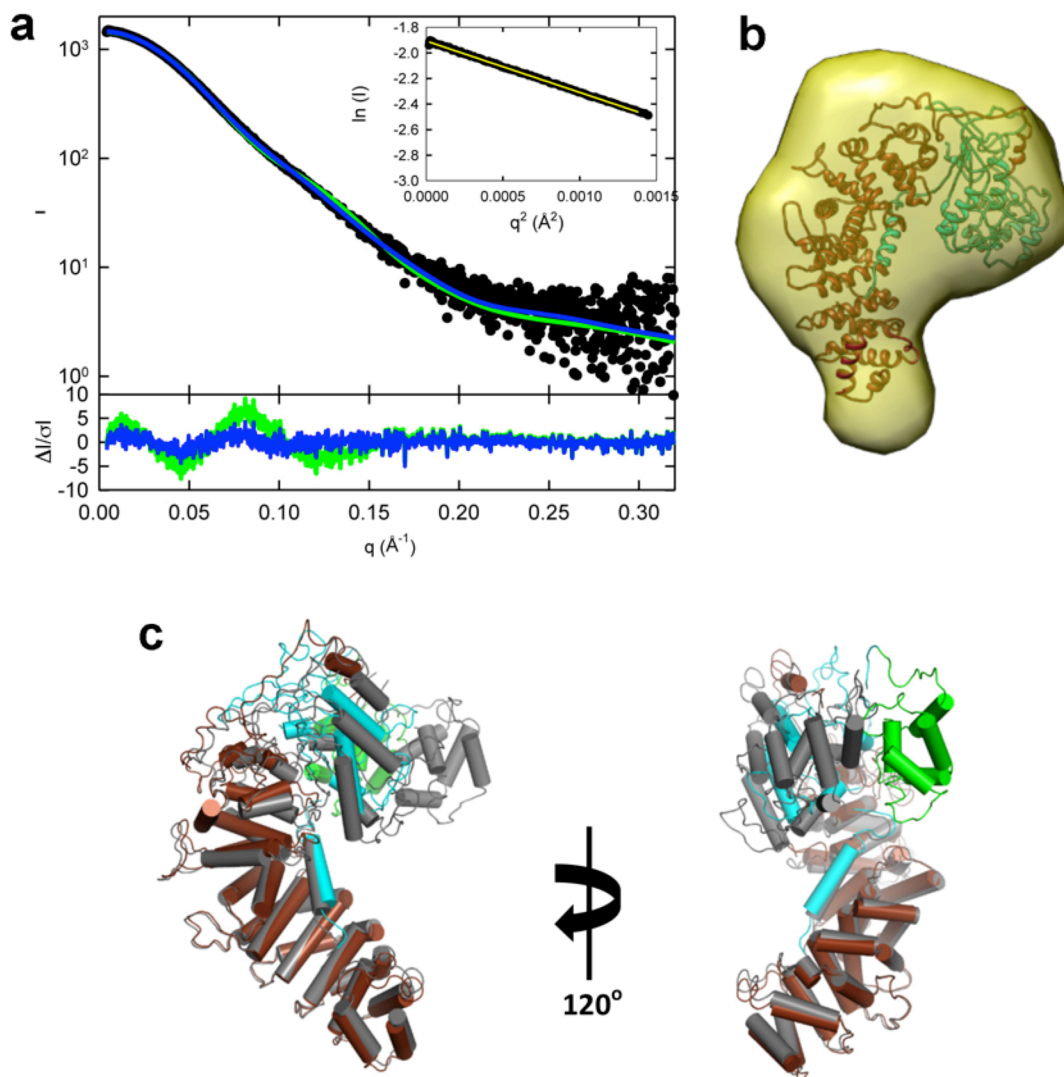

**Supplementary Figure 7. Solution structure and Normal Mode refined model of Ric-8A:ΔN31Gαi1 complex from Small-Angle X-ray scattering.** **a**, Solution scattering profile for Ric-8A:ΔN31Gαi1 complex (closed circles). Inset shows, associate Guinier plot. CRY SOL and SRELEX from the ATSAS software package were used, respectively, to compute scattering profiles from atomic coordinates, and use normal-mode analysis to generate a refined atomic model. Computed scattering curves for cryo-EM-derived atomic coordinates of Ric-8A:ΔN31Gαi1 complex are shown in green and that from normal mode analysis is rendered in blue. The  $\chi^2$  for the fit of the computed scattering curve for the cryo-EM model is 5.48 and that for the normal-mode refined model is 1.24. The bottom panel shows the error-weighted residual difference plots  $\Delta I/\sigma = (I(q)_{\text{experimental}} - CI(q)_{\text{model}})/\sigma I(q)$  vs  $q$ , where  $C$  is a normalizing scale factor. **b**, SREFLEX-refined Ric-8A:ΔN31Gαi1 model fit to the *ab initio* molecular envelope calculated from the experimental SAXS scattering curve (yellow). **c**, Superposition of the SREFLEX-refined model of Ric-8A:ΔN31Gαi (Ric-8A, brown; GTPase domain of ΔN31Gαi, cyan; Helical domain of ΔN31Gαi, green) onto the cryo-EM model (gray), indicating a mode of helical domain rotation that may be preferred in solution in the absence of nanobodies. Models were superimposed using the C $\alpha$  atomic positions of Ric-8A.



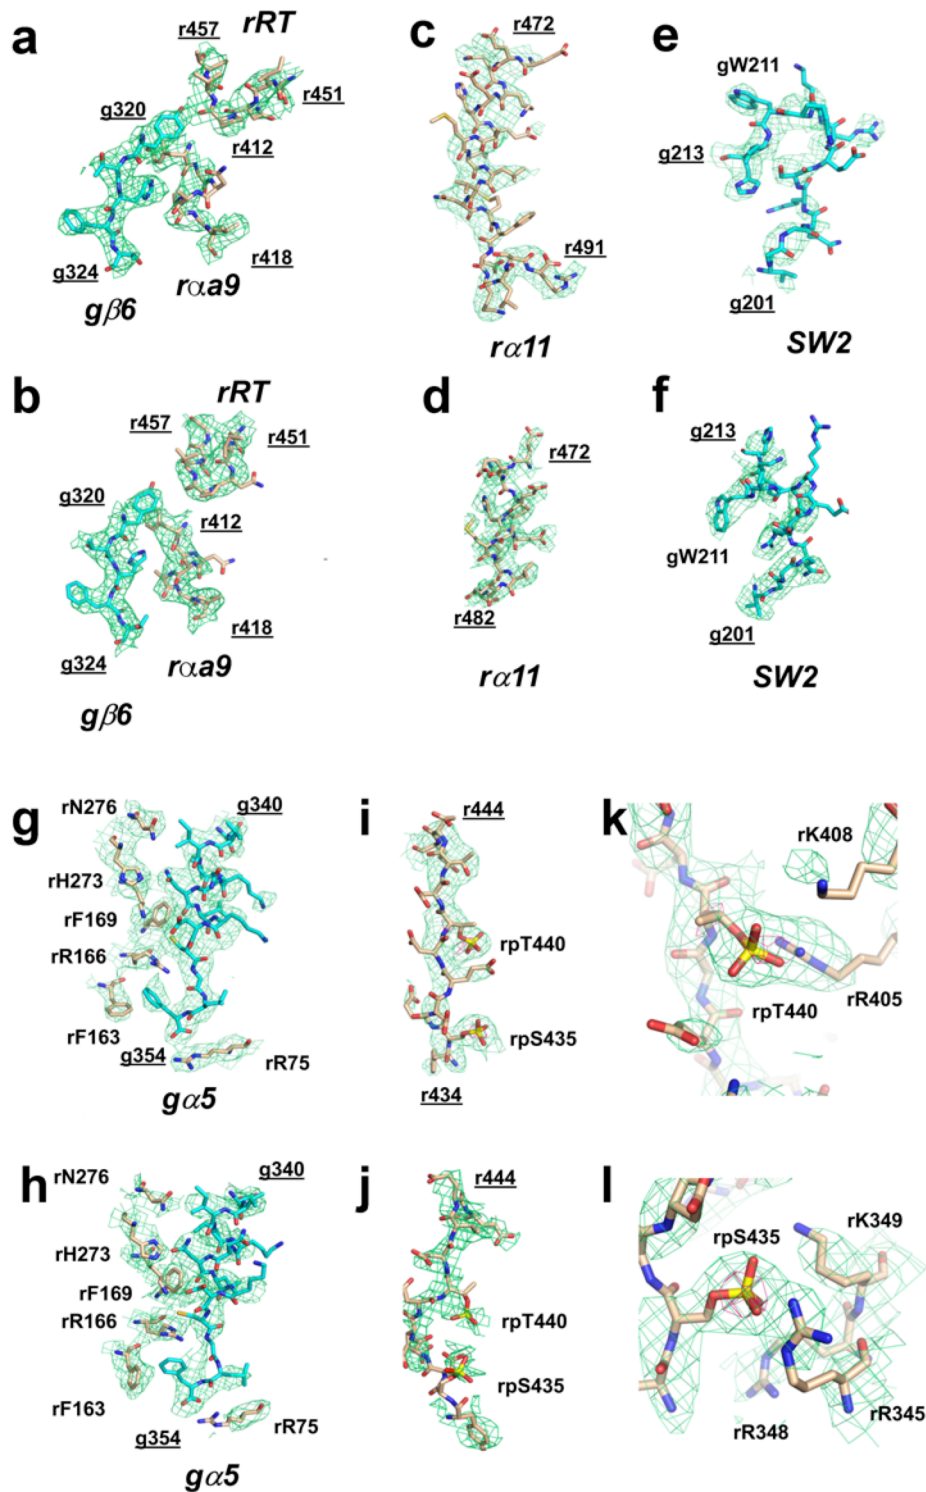

**Supplementary Figure 8. X-ray and cryo-EM density at selected residue ranges.** 2DFo-mFc electron density is contoured at  $1.0\sigma$  and cryo-electron density is contoured at a threshold of 3.5. Structural elements of Ric-8A and G $\alpha$ 1 are labeled in bold italics, N- and C-terminal residue numbers of segments are shown underlined, selected residues are labeled. Carbon atoms in Ric-8A are colored *wheat* and in G $\alpha$ 1, *cyan*. Panels **a**, **c**, **e**, **g** and **i** show residues from crystallographic model with corresponding density. Panels **b**, **d**, **f**, **h** and **j** show the same from the cryo-EM model. Panels **k** and **l**, show the crystallographic model and associated density around phospho-serine 435 and phospho-threonine 440, respectively. The  $5\sigma$  contour level is shown in *red*.





|      |     |                                |        |     |                                           |     |           |
|------|-----|--------------------------------|--------|-----|-------------------------------------------|-----|-----------|
| Gs   | 31  | QKDKQVYRATHRLLLLGAGESGKSTIVKQM | 60     | 212 | FQVDKVNFMFDVGGQRDERRKWIQCFNDVTA           | 243 |           |
| Golf | 102 | REQRDLQQTTHRLLLLGAGESGKSTIVKQM | 131    | 268 | FQVDKVNFMFDVGGQRDERRKWIQCFNDVTA           | 299 |           |
| G12  | 46  | ARERRVRRLLVKILLGAGESGKSTFLKQM  | 75     | 214 | FVIKKIPFKMVDVGGQSRQRKWFQCFDGTIS           | 245 |           |
| G13  | 39  | SREKTYVKRLVKILLGAGESGKSTFLKQM  | 68     | 211 | FEIKNVPFKMVDVGGQSRERKRWFECFDSVTS          | 242 |           |
| GQ   | 30  | NRDKRDARRELKLLLTGTGESGKSTFIKQM | 59     | 194 | FDLQSVIFRMVDVGGQSRERKKWIHCFFENVTS         | 225 |           |
| G11  | 30  | ERDKRDARRELKLLLTGTGESGKSTFIKQM | 59     | 194 | FDLNIIIFRMVDVGGQSRERKKWIHCFFENVTS         | 225 |           |
| GT3  | 24  | QEDAERDARTVKLLLLGAGESGKSTIVKQM | 53     | 189 | FSFKDLNFRMFDVGGQSRERKKWIHCFFEGVTC         | 220 |           |
| GT1  | 20  | KEDAEDARTVKLLLLGAGESGKSTIVKQM  | 49     | 185 | FSFKDLNFRMFDVGGQSRERKKWIHCFFEGVTC         | 216 |           |
| GT2  | 24  | QEDADKEAKTVKLLLLGAGESGKSTIVKQM | 53     | 189 | FSVKDLNFRMFDVGGQSRERKKWIHCFFEGVTC         | 220 |           |
| GO   | 24  | KEDGISAADKVKLLLLGAGESGKSTIVKQM | 53     | 190 | FTFKNLHFRLFVGGQSRERKKWIHCFFEDVTA          | 221 |           |
| GI2  | 24  | REDGEKAAREVKLLLLGAGESGKSTIVKQM | 53     | 190 | FTFKDLHFKMFDVGGQSRERKKWIHCFFGVTA          | 221 |           |
| GI1  | 24  | REDGEKAAREVKLLLLGAGESGKSTIVKQM | 53     | 189 | FTFKDLHFKMFDVGGQSRERKKWIHCFFGVTA          | 220 |           |
| GI3  | 24  | REDGEKAAREVKLLLLGAGESGKSTIVKQM | 53     | 189 | FTFKELYFKMFDVGGQSRERKKWIHCFFGVTA          | 220 |           |
|      |     | : :                            |        |     | * : : : * : : * : : * : : * : : * : : *   |     |           |
|      |     | β1                             | P-loop | α1  | β2                                        | β3  | Switch II |
|      |     |                                |        |     |                                           |     |           |
| Gs   | 268 | EALNLFKSIWNNRWLRTISIVLFLNK     | 293    | 358 | YCYPHFTCAVDTENIRRVFNDCRDI IQRMHLRQYELL    | 394 |           |
| Golf | 324 | ESLDFESIWNNRWLRTISIVLFLNK      | 349    | 414 | YCYPHFTCAVDTENIRRVFNDCRDI IQRMHLRQYELL    | 450 |           |
| G12  | 270 | ESMNIFETIVNKKLFFNVSIIVLFLNK    | 295    | 343 | PLFHHFTTAIDTENIRFVFHAVKDTILQENLKDIMLQ     | 379 |           |
| G13  | 267 | ESLNIFETIVNKRVSIVLFLNK         | 292    | 343 | PLFHHFTTAIDTENIRFVFHAVKDTILQENLKDIMLQ     | 379 |           |
| GQ   | 250 | ESKALFRTIITYPWFQNSSIVLFLNK     | 275    | 341 | PLYHHFTTAINTENIRLVFRDVKDITLHDNLKQLMLQ     | 377 |           |
| G11  | 250 | ESKALFRTIITYPWFQHSIVLFLNK      | 275    | 323 | IYSHFTCATDTENIRFVFAVKDITLQNLKEYNLV        | 359 |           |
| GT3  | 245 | ESLHLFNSICNHKYFATTSIVLFLNK     | 270    | 318 | EIYSHMTCATDTQNVKVFVDAVTDII IKENLKD CGLF   | 354 |           |
| GT1  | 241 | ESLHLFNSICNHRYFATTSIVLFLNK     | 266    | 314 | EIYSHMTCATDTQNVKVFVDAVTDII IKENLKD CGLF   | 350 |           |
| GT2  | 245 | ESLHLFNSICNHKFFAATSIVLFLNK     | 270    | 318 | EIYSHMTCATDTQNVKVFVDAVTDII IKENLKD CGLF   | 354 |           |
| GO   | 246 | ESLMLFDSICNNKFFIDTSIIVLFLNK    | 271    | 318 | EIYCHMTCATDTNNIQVVVDAVTDII IANNLRG CGLF   | 354 |           |
| GI2  | 246 | ESMKLFDSICNNKWFDTDSIIVLFLNK    | 271    | 319 | EIYTHFTCATDTKNVQVFVDAVTDVI IKNNLKD CGLF   | 355 |           |
| GI1  | 245 | ESMKLFDSICNNKWFDTDSIIVLFLNK    | 270    | 318 | EIYTHFTCATDTKNVQVFVDAVTDVI IKNNLKD CGLF   | 354 |           |
| GI3  | 245 | ESMKLFDSICNNKWFDTDSIIVLFLNK    | 270    | 318 | EIYTHFTCATDTKNVQVFVDAVTDVI IKNNLKD CGLF   | 354 |           |
|      |     | * : * : * : *                  |        |     | * : * : * : * : * : * : * : * : * : * : * |     |           |
|      |     | α3                             | β5     | p1  | β6                                        | p2  | α5        |

**Supplementary Figure 9b. Sequence of rat Gα isoforms within Ric-8A contact regions.**

Residue numbers are shown at the start and end of subsequences that harbor Ric-8A contacting-residues, highlighted in *green* in the sequence of Gα1, defined as those that include at least one atom within 4.0 of an atom in Ric-8A. Amino acids not identical in Gαi and Gαs are highlighted in *red*, in the conservation summary at the bottom of each alignment. Central residues of secondary structural elements are shown below the conservation summary. Symbols p1 and p2 denote guanine nucleotide purine binding sites formed at the β5-αG and β6-α5 loops, respectively.

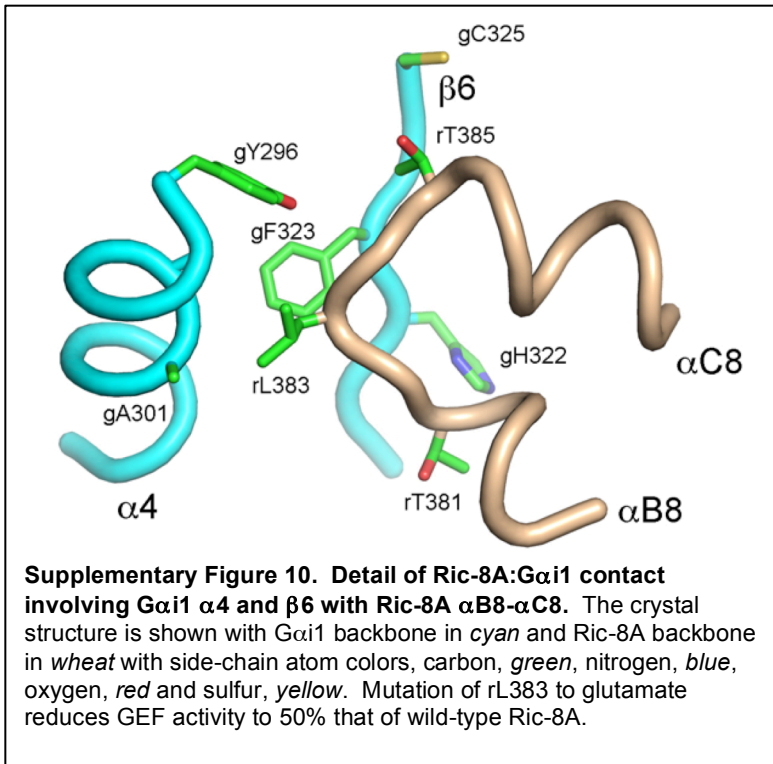

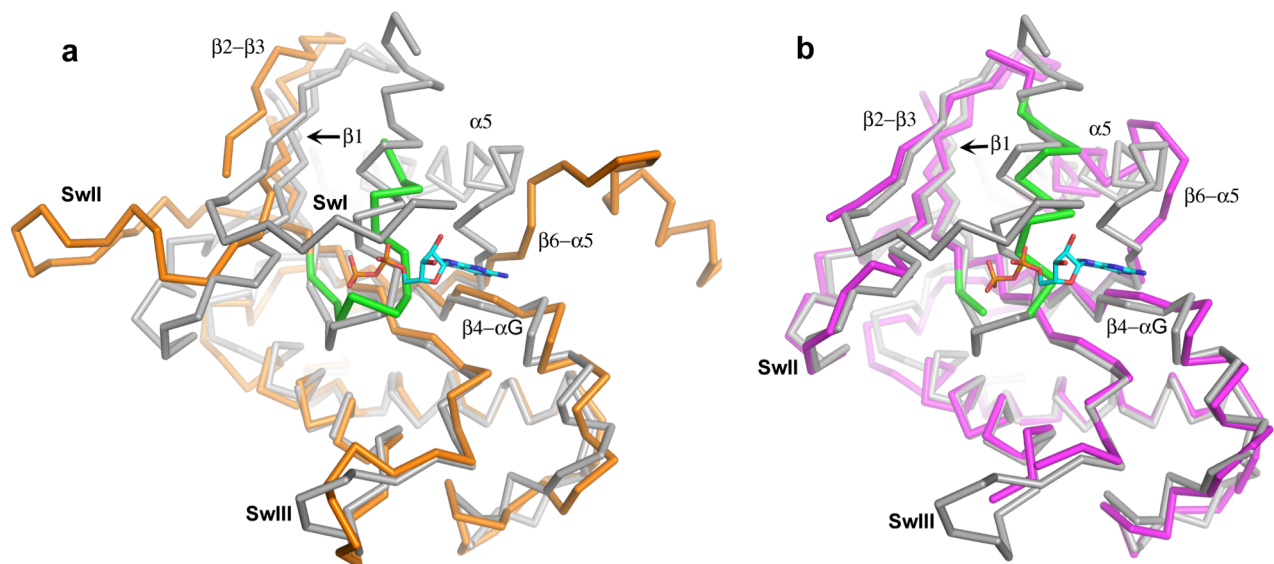

**Supplementary Figure 11. Conformational perturbations induced in the G $\alpha$  Ras domain by Ric-8A and a G protein-coupled Receptor.** **a**, C $\alpha$ -ribbon diagram showing superposition of G $\alpha$ i1•GDP from the complex with G $\beta$ 1 and G $\gamma$ 2 (PDB 1GG2), *gray*, onto the Ras domain of G $\alpha$ i1, *orange*, bound to Ric-8A using residues 32-50 and 184-326. The  $\alpha$ 1 helix and P-loop of Ric-8A-bound G $\alpha$ i1 is rendered *green*. GDP is shown as a stick model. **b**, G $\alpha$ i1•GDP, as in panel **a** is shown superimposed, using the same residues, onto the Ras domain of G $\alpha$ i2, *magenta*, bound to the A<sub>1</sub> Adenosine receptor (PDB 6D9H).
